# Supplementary material for: Factors Associated with Gonioscopy Before Glaucoma Procedures in the IRIS® Registry
Source: PubMed Central journal article supplement (PMC11774446; doi:10.21203/rs.3.rs-5789587/v1), 2025-01-13
Supplement: NIHPPRS5789587v1-supplement-1.pdf [file NIHPPRS5789587v1-supplement-1.pdf]

## Supplementary Files

This is a list of supplementary files associated with this preprint. Click to download.

- [SupplementaryTable.docx](#)
